# Supplementary material for: Synthesis, characterization and optimization of heterogeneous catalytic cyclohexene oxidation by tungstophospho(aqua)ruthenate via the fractional factorial design methodology
Source: Royal Society of Chemistry journal article supplement (doi:10.1039/c8nj02690d), 2018-01-01
Supplement: c8nj02690d1.pdf [file c8nj02690d1.pdf]

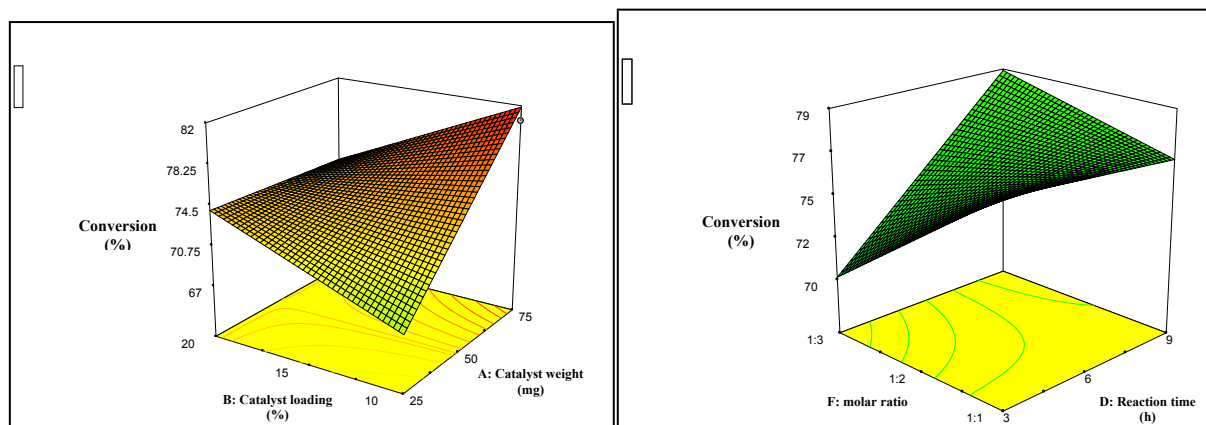

Figure S1. 3D surface plots for cyclohexene conversion as function of six factors.

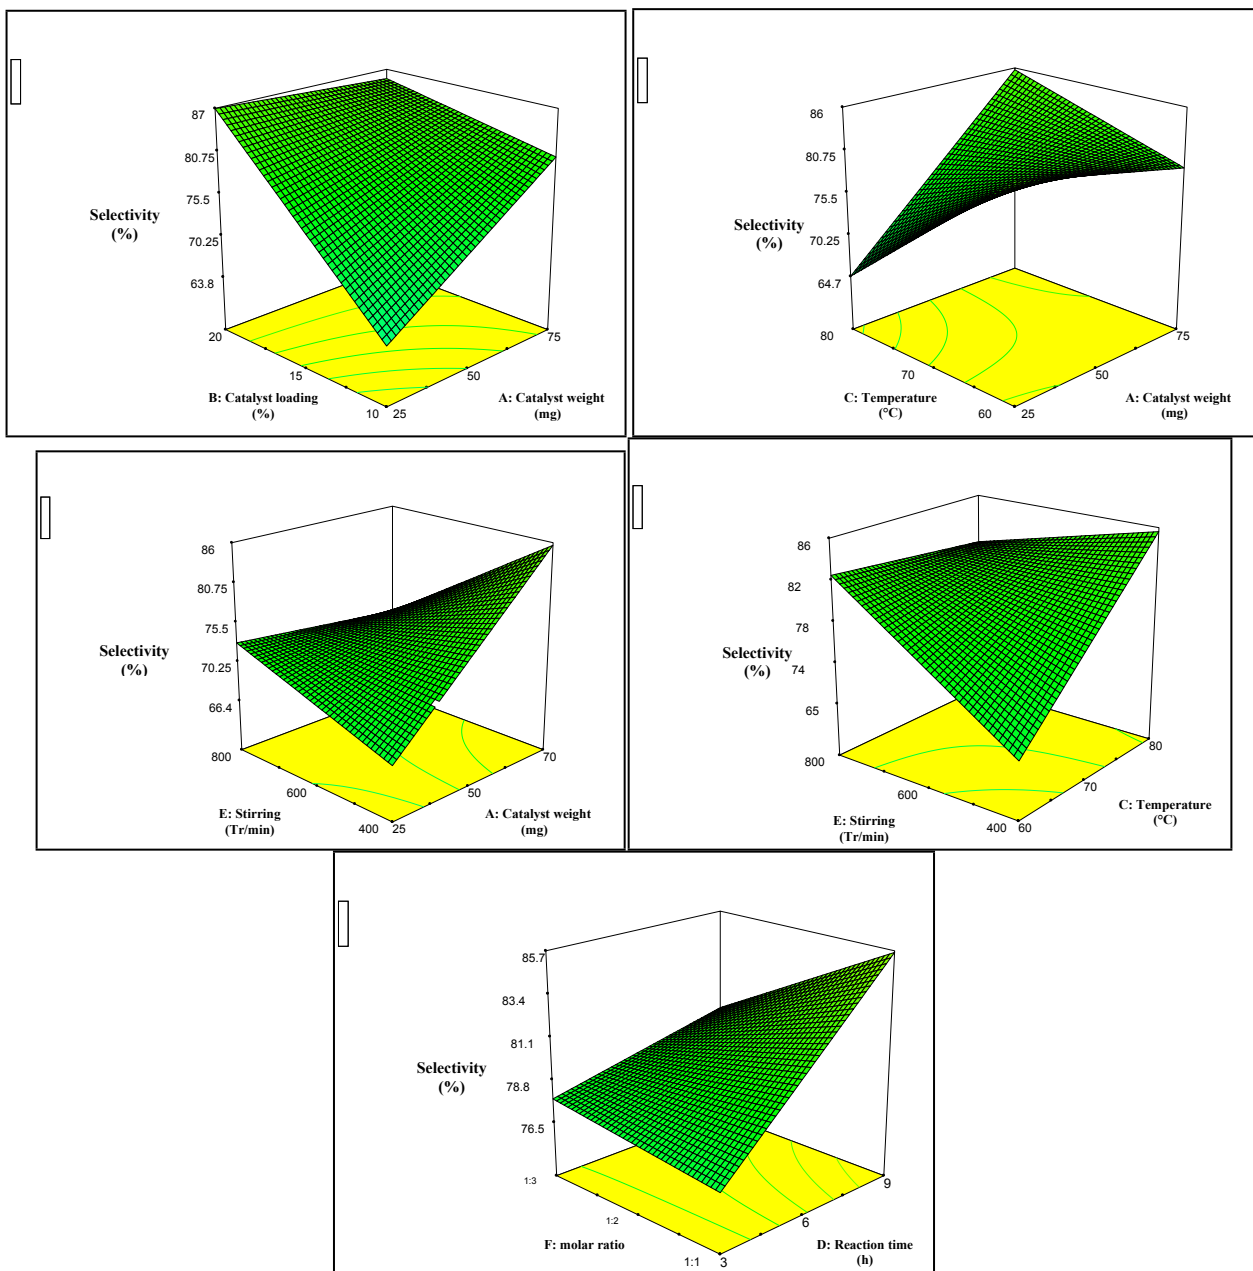

**Figure S2.** Scheme 3D surface plots for the selectivity of cyclohexene oxide as function of six factors.

**Table S1.** Analysis of variance (ANOVA) for selected fractional factorial model for the responses

| Factors   | Sum of squares |            | Df [a] | Mean square |            | F          |            | p-value  |          |
|-----------|----------------|------------|--------|-------------|------------|------------|------------|----------|----------|
|           | Y1             | Y2         |        | Y1          | Y2         | Y1         | Y2         | Y1       | Y2       |
| Model     | 5357.32683     | 1955.51285 | 18     | 297.629268  | 85.0222977 | 10.8520193 | 38.0243365 | < 0.0001 | < 0.0001 |
| A         | 405.626403     | 44.1095281 | 1      | 405.626403  | 44.1095281 | 14.7897604 | 19.7270079 | 0.0020   | 0.0022   |
| B         | 84.3375781     | 150.988753 | 1      | 84.3375781  | 150.988753 | 3.07507736 | 67.5263704 | 0.1030   | < 0.0001 |
| C         | 29.7027781     | 22.8657031 | 1      | 29.7027781  | 22.8657031 | 1.08300882 | 10.2261785 | 0.3170   | 0.0127   |
| D         | 3873.54015     | 613.287753 | 1      | 3873.54015  | 613.287753 | 141.235211 | 274.279343 | < 0.0001 | < 0.0001 |
| E         | 1.66075313     | 7.04062813 | 1      | 1.66075313  | 7.04062813 | 0.0605536  | 3.14876474 | 0.8095   | 0.1139   |
| F         | 284.232403     | 426.247003 | 1      | 284.232403  | 426.247003 | 10.3635491 | 190.629516 | 0.0067   | < 0.0001 |
| AB        | 448.426378     | 60.8580281 | 1      | 448.426378  | 60.8580281 | 16.3503131 | 27.217403  | 0.0014   | 0.0008   |
| AC        | 0.13650312     | 114.420628 | 1      | 0.13650312  | 114.420628 | 0.00497711 | 51.1720877 | 0.9448   | < 0.0001 |
| AD        | 10.2265031     | 0.29837813 | 1      | 10.2265031  | 0.29837813 | 0.37287398 | 0.133443   | 0.5520   | 0.7244   |
| AE        | 0.05865313     | 68.3572781 | 1      | 0.05865313  | 68.3572781 | 0.00213858 | 30.5712762 | 0.9638   | 0.0006   |
| AF        | 6.31012813     | 8.35382813 | 1      | 6.31012813  | 8.35382813 | 0.23007694 | 3.73606431 | 0.6394   | 0.0893   |
| BC        | 127.560378     | 54.7842781 | 1      | 127.560378  | 54.7842781 | 4.6510469  | 24.5010531 | 0.0503   | 0.0011   |
| BD        | 4.43275313     | 4.38820313 | 1      | 4.43275313  | 4.38820313 | 0.16162497 | 1.9625265  | 0.6942   | 0.1988   |
| BE        | 1.15140312     | 4.76632813 | 1      | 1.15140312  | 4.76632813 | 0.04198192 | 2.13163452 | 0.8408   | 0.1824   |
| BF        | 40.1184031     | 2.54815313 | 1      | 40.1184031  | 2.54815313 | 1.46277847 | 1.13960496 | 0.2480   | 0.3169   |
| CE        | 0.16387813     | 33.3540281 | 1      | 0.16387813  | 33.3540281 | 0.00597525 | 14.9168492 | 0.9396   | 0.0048   |
| DE        | 21.1737781     | 19.9554031 | 1      | 21.1737781  | 19.9554031 | 0.7720284  | 8.92461137 | 0.3955   | 0.0174   |
| EF        | 18.4680031     | 2.21025313 | 1      | 18.4680031  | 2.21025313 | 0.6733717  | 0.98848668 | 0.4267   | 0.3492   |
| Residual  | 356.540141     | 17.887975  | 13     | 27.4261647  | 2.23599688 |            |            |          |          |
| Cor Total | 5713.86697     | 1973.40082 | 31     |             |            |            |            |          |          |

Df: degree of freedom; Y<sub>1</sub>: R<sup>2</sup>= 0.9197, R<sup>2</sup> adjusted = 0.8869; Y<sub>2</sub>: R<sup>2</sup>= 0.9843, R<sup>2</sup> adjusted =0.9557

---

**Table S2.** Oxidation of cyclohexene using different catalysts <sup>[a]</sup>.

| Variables | Conversion (Y1) | Selectivity (Y2) |
|-----------|-----------------|------------------|
|           | Coefficient     | coefficient      |
| Constant  | 59.07           | 68.6116          |
| A         | 3.56            | 1.1741           |
| B         | 1.62            | 2.1722           |
| C         | -0.96           | -0.8453          |
| D         | 11.00           | 4.3778           |
| E         | 0.23            | -0.4691          |
| F         | 2.98            | -3.6497          |
| AB        | -3.74           | -1.3791          |
| AC        | -0.07           | 1.8909           |
| AD        | 0.57            | 0.0966           |
| AE        | -0.04           | -1.4616          |
| AF        | -0.44           | -0.5109          |
| BC        | 2.00            | -1.3084          |
| BD        | 0.37            | -0.3703          |
| BE        | -0.19           | -0.3859          |
| BF        | -1.12           | 0.2822           |
| CE        | -0.07           | -1.0209          |
| DE        | -0.81           | 0.7897           |
| EF        | 0.76            | -0.2628          |

---
